# Supplementary material for: Dependence of the Staphylococcal Volatilome Composition on Microbial Nutrition
Source: MDPI journal article supplement (doi:10.3390/metabo10090347), 2020-08-27
Supplement: s1 [file s1]

## Supplementary Information

for

### Dependence of the Staphylococcal Volatilome Composition on Microbial Nutrition

Carrie L. Jenkins and Heather D. Bean

**Table S1** See **Supplementary File**. Volatile compounds detected in the headspace of *in vitro* cultures of *S. aureus* (Sa) or *S. epidermidis* (Se) cultured in brain heart infusion (BHI), lysogeny broth Lennox (LB), Mueller-Hinton broth (MHB), or tryptic soy broth (TSB).

**Table S2** Number of volatiles produced in 16 chemical classes by culturing *S. aureus* (Sa) or *S. epidermidis* (Se) in brain heart infusion (BHI), lysogeny broth (LB), Mueller-Hinton broth (MHB), or tryptic soy broth (TSB). A list of abbreviations for the chemical classes is provided in Table S1.

|         | NIT-ARO | A/E-ARO | KET-ARO | ALD-ARO | ALC-ARO | HC-ARO | HET-ARO | HALO | SULF | NIT | A/E | ETH | KET | ALD | ALC | HC | Total |
|---------|---------|---------|---------|---------|---------|--------|---------|------|------|-----|-----|-----|-----|-----|-----|----|-------|
| BHI, Sa | 0       | 0       | 0       | 0       | 0       | 0      | 6       | 1    | 3    | 1   | 6   | 1   | 13  | 1   | 2   | 13 | 47    |
| BHI, Se | 0       | 0       | 1       | 1       | 0       | 3      | 4       | 3    | 7    | 0   | 3   | 4   | 13  | 2   | 5   | 30 | 76    |
| LB, Sa  | 1       | 0       | 0       | 0       | 1       | 1      | 10      | 2    | 7    | 2   | 2   | 0   | 13  | 0   | 5   | 19 | 63    |
| LB, Se  | 1       | 1       | 0       | 1       | 1       | 2      | 6       | 2    | 5    | 0   | 3   | 0   | 11  | 2   | 3   | 25 | 63    |
| MHB, Sa | 0       | 0       | 0       | 0       | 0       | 0      | 1       | 1    | 5    | 1   | 0   | 1   | 6   | 1   | 4   | 18 | 38    |
| MHB, Se | 1       | 0       | 0       | 2       | 0       | 3      | 2       | 2    | 2    | 1   | 1   | 0   | 4   | 0   | 2   | 17 | 37    |
| TSB, Sa | 0       | 0       | 0       | 0       | 0       | 2      | 10      | 3    | 3    | 2   | 5   | 0   | 11  | 0   | 2   | 16 | 54    |
| TSB, Se | 0       | 0       | 0       | 1       | 0       | 0      | 7       | 0    | 0    | 3   | 1   | 0   | 4   | 2   | 1   | 8  | 27    |
| BHI     | 0       | 0       | 1       | 1       | 0       | 3      | 7       | 4    | 7    | 1   | 9   | 5   | 20  | 3   | 5   | 31 | 97    |
| LB      | 1       | 1       | 0       | 1       | 1       | 2      | 11      | 2    | 10   | 2   | 3   | 0   | 16  | 2   | 7   | 30 | 89    |
| MHB     | 1       | 1       | 0       | 2       | 0       | 3      | 3       | 3    | 4    | 2   | 1   | 1   | 8   | 1   | 5   | 24 | 59    |
| TSB     | 0       | 0       | 0       | 1       | 0       | 2      | 10      | 3    | 3    | 3   | 5   | 0   | 12  | 2   | 2   | 19 | 62    |
| Sa      | 1       | 0       | 0       | 0       | 1       | 3      | 12      | 4    | 11   | 3   | 10  | 2   | 18  | 1   | 7   | 29 | 102   |
| Se      | 1       | 1       | 1       | 2       | 1       | 5      | 9       | 4    | 9    | 3   | 4   | 4   | 16  | 6   | 7   | 37 | 110   |
| Total   | 1       | 1       | 1       | 2       | 1       | 7      | 13      | 5    | 12   | 4   | 11  | 5   | 23  | 6   | 12  | 42 | 146   |

**Table S3** Number of volatiles produced in 16 chemical classes by culturing *S. aureus* (Sa) or *S. epidermidis* (Se) in brain heart infusion (BHI), lysogeny broth (LB), Mueller-Hinton broth (MHB), or tryptic soy broth (TSB), normalized to the total number in each row in Table S2. A list of abbreviations for the chemical classes is provided in Table S1.

|         | NIT-ARO | A/E-ARO | KET-ARO | ALD-ARO | ALC-ARO | HC-ARO | HET-ARO | HALO | SULF | NIT  | A/E  | ETH  | KET  | ALD  | ALC  | HC   |
|---------|---------|---------|---------|---------|---------|--------|---------|------|------|------|------|------|------|------|------|------|
| BHI, Sa | 0.00    | 0.00    | 0.00    | 0.00    | 0.00    | 0.00   | 0.13    | 0.02 | 0.06 | 0.02 | 0.13 | 0.02 | 0.28 | 0.02 | 0.04 | 0.28 |
| BHI, Se | 0.00    | 0.00    | 0.01    | 0.01    | 0.00    | 0.04   | 0.05    | 0.04 | 0.09 | 0.00 | 0.04 | 0.05 | 0.17 | 0.03 | 0.07 | 0.39 |
| LB, Sa  | 0.02    | 0.00    | 0.00    | 0.00    | 0.02    | 0.02   | 0.16    | 0.03 | 0.11 | 0.03 | 0.03 | 0.00 | 0.21 | 0.00 | 0.08 | 0.30 |
| LB, Se  | 0.02    | 0.02    | 0.00    | 0.02    | 0.02    | 0.03   | 0.10    | 0.03 | 0.08 | 0.00 | 0.05 | 0.00 | 0.17 | 0.03 | 0.05 | 0.40 |
| MHB, Sa | 0.00    | 0.00    | 0.00    | 0.00    | 0.00    | 0.00   | 0.03    | 0.03 | 0.13 | 0.03 | 0.00 | 0.03 | 0.16 | 0.03 | 0.11 | 0.47 |
| MHB, Se | 0.03    | 0.00    | 0.00    | 0.05    | 0.00    | 0.08   | 0.05    | 0.05 | 0.05 | 0.03 | 0.03 | 0.00 | 0.11 | 0.00 | 0.05 | 0.46 |
| TSB, Sa | 0.00    | 0.00    | 0.00    | 0.00    | 0.00    | 0.04   | 0.19    | 0.06 | 0.06 | 0.04 | 0.09 | 0.00 | 0.20 | 0.00 | 0.04 | 0.30 |
| TSB, Se | 0.00    | 0.00    | 0.00    | 0.04    | 0.00    | 0.00   | 0.26    | 0.00 | 0.00 | 0.11 | 0.04 | 0.00 | 0.15 | 0.07 | 0.04 | 0.30 |
| BHI     | 0.00    | 0.00    | 0.01    | 0.01    | 0.00    | 0.03   | 0.07    | 0.04 | 0.07 | 0.01 | 0.09 | 0.05 | 0.21 | 0.03 | 0.05 | 0.32 |
| LB      | 0.01    | 0.01    | 0.00    | 0.01    | 0.01    | 0.02   | 0.12    | 0.02 | 0.11 | 0.02 | 0.03 | 0.00 | 0.18 | 0.02 | 0.08 | 0.34 |
| MHB     | 0.02    | 0.02    | 0.00    | 0.03    | 0.00    | 0.05   | 0.05    | 0.05 | 0.07 | 0.03 | 0.02 | 0.02 | 0.14 | 0.02 | 0.08 | 0.41 |
| TSB     | 0.00    | 0.00    | 0.00    | 0.02    | 0.00    | 0.03   | 0.16    | 0.05 | 0.05 | 0.05 | 0.08 | 0.00 | 0.19 | 0.03 | 0.03 | 0.31 |
| Sa      | 0.01    | 0.00    | 0.00    | 0.00    | 0.01    | 0.03   | 0.12    | 0.04 | 0.11 | 0.03 | 0.10 | 0.02 | 0.18 | 0.01 | 0.07 | 0.28 |
| Se      | 0.01    | 0.01    | 0.01    | 0.02    | 0.01    | 0.05   | 0.08    | 0.04 | 0.08 | 0.03 | 0.04 | 0.04 | 0.15 | 0.05 | 0.06 | 0.34 |
| Total   | 0.01    | 0.01    | 0.01    | 0.01    | 0.01    | 0.05   | 0.09    | 0.03 | 0.08 | 0.03 | 0.08 | 0.03 | 0.16 | 0.04 | 0.08 | 0.29 |

**Table S4** Relative abundances of volatiles produced in 16 chemical classes by culturing *S. aureus* (Sa) or *S. epidermidis* (Se) in brain heart infusion (BHI), lysogeny broth (LB), Mueller-Hinton broth (MHB), or tryptic soy broth (TSB). A list of abbreviations for the chemical classes is provided in Table S1.

|         | NIT-ARO | A/E-ARO | KET-ARO | ALD-ARO | ALC-ARO | HC-ARO | HET-ARO | HALO  | SULF  | NIT   | A/E    | ETH | KET    | ALD  | ALC   | HC     | Total   |
|---------|---------|---------|---------|---------|---------|--------|---------|-------|-------|-------|--------|-----|--------|------|-------|--------|---------|
| BHI, Sa | 0       | 0       | 0       | 0       | 0       | 0      | 40      | 11    | 284   | 68    | 161709 | 4   | 41786  | 3    | 28    | 126053 | 329986  |
| BHI, Se | 0       | 0       | 19953   | 11      | 0       | 8      | 15857   | 12983 | 778   | 0     | 266498 | 10  | 179    | 3164 | 730   | 20131  | 340302  |
| LB, Sa  | 2       | 0       | 0       | 0       | 3       | 2      | 1505    | 39    | 39936 | 39816 | 204    | 0   | 35495  | 0    | 44    | 2259   | 119305  |
| LB, Se  | 2       | 7       | 0       | 5       | 2       | 4838   | 22635   | 96    | 145   | 0     | 80099  | 0   | 1224   | 5    | 40173 | 59903  | 209134  |
| MHB, Sa | 0       | 0       | 0       | 0       | 0       | 0      | 7       | 45    | 1656  | 5     | 0      | 2   | 63912  | 3    | 16    | 8671   | 74317   |
| MHB, Se | 3       | 0       | 0       | 642     | 0       | 7      | 14      | 1266  | 255   | 5     | 3162   | 0   | 34     | 0    | 25    | 176    | 5589    |
| TSB, Sa | 0       | 0       | 0       | 0       | 0       | 1587   | 301531  | 2041  | 215   | 416   | 704277 | 0   | 20646  | 0    | 81    | 8751   | 1039545 |
| TSB, Se | 0       | 0       | 0       | 3       | 0       | 0      | 9616    | 0     | 0     | 809   | 100000 | 0   | 1276   | 44   | 32    | 26     | 111806  |
| BHI     | 0       | 0       | 19953   | 11      | 0       | 8      | 15889   | 12995 | 659   | 68    | 342286 | 15  | 41844  | 3168 | 730   | 138096 | 575722  |
| LB      | 2       | 0       | 0       | 5       | 3       | 4838   | 23600   | 96    | 40380 | 39816 | 80099  | 0   | 36093  | 5    | 40210 | 61935  | 327082  |
| MHB     | 3       | 7       | 0       | 642     | 0       | 7      | 22      | 1311  | 1638  | 11    | 3162   | 2   | 63936  | 3    | 38    | 8654   | 79436   |
| TSB     | 0       | 0       | 0       | 3       | 0       | 1587   | 301536  | 2041  | 215   | 1211  | 704277 | 0   | 20656  | 44   | 99    | 8760   | 1040429 |
| Sa      | 2       | 0       | 0       | 0       | 3       | 1589   | 301551  | 2110  | 41960 | 40227 | 830188 | 6   | 142016 | 3    | 121   | 143233 | 1503009 |
| Se      | 3       | 7       | 19953   | 642     | 2       | 4845   | 38064   | 13067 | 1132  | 811   | 295816 | 10  | 2514   | 3272 | 40581 | 72876  | 493595  |
| Total   | 3       | 7       | 19953   | 642     | 3       | 6433   | 323680  | 13111 | 42190 | 41022 | 912931 | 15  | 142624 | 3272 | 40668 | 207642 | 1754196 |

**Table S5** Relative abundances of volatiles produced in 16 chemical classes by culturing *S. aureus* (Sa) or *S. epidermidis* (Se) in brain heart infusion (BHI), lysogeny broth (LB), Mueller-Hinton broth (MHB), or tryptic soy broth (TSB), normalized to the total abundance in each row in Table S4. A list of abbreviations for the chemical classes is provided in Table S1.

|         | NIT-ARO | A/E-ARO | KET-ARO | ALD-ARO | ALC-ARO | HC-ARO | HET-ARO | HALO | SULF | NIT  | A/E  | ETH  | KET  | ALD  | ALC  | HC   |
|---------|---------|---------|---------|---------|---------|--------|---------|------|------|------|------|------|------|------|------|------|
| BHI, Sa | 0.00    | 0.00    | 0.00    | 0.00    | 0.00    | 0.00   | 0.00    | 0.00 | 0.00 | 0.00 | 0.49 | 0.00 | 0.13 | 0.00 | 0.00 | 0.38 |
| BHI, Se | 0.00    | 0.00    | 0.06    | 0.00    | 0.00    | 0.00   | 0.05    | 0.04 | 0.00 | 0.00 | 0.78 | 0.00 | 0.00 | 0.01 | 0.00 | 0.06 |
| LB, Sa  | 0.00    | 0.00    | 0.00    | 0.00    | 0.00    | 0.00   | 0.01    | 0.00 | 0.33 | 0.33 | 0.00 | 0.00 | 0.30 | 0.00 | 0.00 | 0.02 |
| LB, Se  | 0.00    | 0.00    | 0.00    | 0.00    | 0.00    | 0.02   | 0.11    | 0.00 | 0.00 | 0.00 | 0.38 | 0.00 | 0.01 | 0.00 | 0.19 | 0.29 |
| MHB, Sa | 0.00    | 0.00    | 0.00    | 0.00    | 0.00    | 0.00   | 0.00    | 0.00 | 0.02 | 0.00 | 0.00 | 0.00 | 0.86 | 0.00 | 0.00 | 0.12 |
| MHB, Se | 0.00    | 0.00    | 0.00    | 0.11    | 0.00    | 0.00   | 0.00    | 0.23 | 0.05 | 0.00 | 0.57 | 0.00 | 0.01 | 0.00 | 0.00 | 0.03 |
| TSB, Sa | 0.00    | 0.00    | 0.00    | 0.00    | 0.00    | 0.00   | 0.29    | 0.00 | 0.00 | 0.00 | 0.68 | 0.00 | 0.02 | 0.00 | 0.00 | 0.01 |
| TSB, Se | 0.00    | 0.00    | 0.00    | 0.00    | 0.00    | 0.00   | 0.09    | 0.00 | 0.00 | 0.01 | 0.89 | 0.00 | 0.01 | 0.00 | 0.00 | 0.00 |
| BHI     | 0.00    | 0.00    | 0.03    | 0.00    | 0.00    | 0.00   | 0.03    | 0.02 | 0.00 | 0.00 | 0.59 | 0.00 | 0.07 | 0.01 | 0.00 | 0.24 |
| LB      | 0.00    | 0.00    | 0.00    | 0.00    | 0.00    | 0.01   | 0.07    | 0.00 | 0.12 | 0.12 | 0.24 | 0.00 | 0.11 | 0.00 | 0.12 | 0.19 |
| MHB     | 0.00    | 0.00    | 0.00    | 0.01    | 0.00    | 0.00   | 0.00    | 0.02 | 0.02 | 0.00 | 0.04 | 0.00 | 0.80 | 0.00 | 0.00 | 0.11 |
| TSB     | 0.00    | 0.00    | 0.00    | 0.00    | 0.00    | 0.00   | 0.29    | 0.00 | 0.00 | 0.00 | 0.68 | 0.00 | 0.02 | 0.00 | 0.00 | 0.01 |
| Sa      | 0.00    | 0.00    | 0.00    | 0.00    | 0.00    | 0.00   | 0.20    | 0.00 | 0.03 | 0.03 | 0.55 | 0.00 | 0.09 | 0.00 | 0.00 | 0.10 |
| Se      | 0.00    | 0.00    | 0.04    | 0.00    | 0.00    | 0.01   | 0.08    | 0.03 | 0.00 | 0.00 | 0.60 | 0.00 | 0.01 | 0.01 | 0.08 | 0.15 |
| Total   | 0.00    | 0.00    | 0.01    | 0.00    | 0.00    | 0.00   | 0.18    | 0.01 | 0.02 | 0.02 | 0.52 | 0.00 | 0.08 | 0.00 | 0.02 | 0.12 |

**Table S6** Media composition and characteristics

|                   | BRAIN HEART INFUSION             |        | LYSOGENY BROTH LENNOX                                                                          |        | MUELLER HINTON BROTH                                                                        |                                 | TRYPTIC SOY BROTH           |        |
|-------------------|----------------------------------|--------|------------------------------------------------------------------------------------------------|--------|---------------------------------------------------------------------------------------------|---------------------------------|-----------------------------|--------|
| Manufacturer      | Bacto                            |        | Bacto                                                                                          |        | Difco                                                                                       |                                 | Bacto                       |        |
| Part Number(s)    | 237500                           |        | 211705, 288620                                                                                 |        | 275730                                                                                      |                                 | 211825                      |        |
| Protein source(s) | Proteose Peptone                 | 10.0 g | Tryptone                                                                                       | 10.0 g | Acid Digest of Casein                                                                       | 17.5 g                          | Pancreatic Digest of Casein | 17.0 g |
|                   | Calf Brain Infusion              | 7.7 g  |                                                                                                |        | Beef Extract Powder                                                                         | 2.0 g                           | Papaic Digest of Soybean    | 3.0 g  |
|                   | Beef Heart Infusion              | 9.8 g  |                                                                                                |        |                                                                                             |                                 |                             |        |
| Sugar/Starch      | Dextrose                         | 2.0 g  | Starch (amylopectin)                                                                           |        | 1.5 g                                                                                       | Dextrose                        | 2.5 g                       |        |
| Salts             | NaCl                             | 5.0 g  | NaCl                                                                                           |        | 5.0 g                                                                                       | NaCl                            | 5.0 g                       |        |
| Buffer            | Na <sub>2</sub> HPO <sub>4</sub> | 2.5 g  |                                                                                                |        |                                                                                             | K <sub>2</sub> HPO <sub>4</sub> | 2.5 g                       |        |
| Other             |                                  |        | Yeast extract                                                                                  |        | 5.0 g                                                                                       |                                 |                             |        |
| Notes             |                                  |        | • No cholesterol<br>• No saturated fatty acids<br>• Yeast extract total carbohydrates = 816 mg |        | • Not cation-adjusted (Ca <sup>2+</sup> , Mg <sup>2+</sup> )<br>• Low thymine and thymidine |                                 |                             |        |

**Table S7** Parameters for HS-SPME volatiles sampling, GC×GC-TOF analysis, and data processing and alignment

| Autosampler Method                 |                                                                                                                                          |
|------------------------------------|------------------------------------------------------------------------------------------------------------------------------------------|
| Instrument description             | Gerstel® MPS Pro®                                                                                                                        |
| Software description               | Gerstel® Maestro® (version 1.5.3.2)                                                                                                      |
| Sampling Parameters                |                                                                                                                                          |
| Cooled tray temperature            | 4 °C                                                                                                                                     |
| Solid-phase microextraction (SPME) | Manufacturer: Supelco®<br>Fiber type: PDMS/CAR/DVB (2 cm; 50/30 µm)                                                                      |
| Incubation time                    | 5 min                                                                                                                                    |
| Agitator parameters, incubation    | Temperature: 50 °C<br>On time: 10 s<br>Off time: 1 s<br>Speed: 600 rpm                                                                   |
| Agitation, sampling                | On                                                                                                                                       |
| Vial penetration                   | 21 mm                                                                                                                                    |
| Extraction time                    | 10 min                                                                                                                                   |
| Injection penetration              | 67 mm                                                                                                                                    |
| Desorption time                    | 180 s                                                                                                                                    |
| Inlet (CIS) Parameters             |                                                                                                                                          |
| Initial temperature                | 250 °C                                                                                                                                   |
| Equilibrium time                   | 0.05 min                                                                                                                                 |
| Initial time                       | 0.10 min                                                                                                                                 |
| Ramp rate                          | 12 °C·s <sup>-1</sup>                                                                                                                    |
| End temperature                    | 250 °C                                                                                                                                   |
| Hold time                          | 10.5 min                                                                                                                                 |
| GC×GC Method                       |                                                                                                                                          |
| Instrument description             | Agilent® 7890B                                                                                                                           |
| Column configuration               | Column 1: Rxi®-624Sil MS, 60 m × 0.25 mm × 1.4 µm<br>Column 2: Stabilwax®, 1 m × 0.25 mm × 0.5 µm                                        |
| Carrier gas                        | Helium, 2 mL·min <sup>-1</sup> (constant)                                                                                                |
| Front inlet type                   | Gerstel®                                                                                                                                 |
| Front inlet mode                   | Splitless                                                                                                                                |
| Front inlet septum purge flow      | 1 mL·min <sup>-1</sup>                                                                                                                   |
| Front inlet septum purge time      | 300 s                                                                                                                                    |
| Front inlet purge flow             | 50 mL·min <sup>-1</sup>                                                                                                                  |
| Front inlet total purge flow       | 52 mL·min <sup>-1</sup>                                                                                                                  |
| Oven equilibration time            | 5 s                                                                                                                                      |
| Primary oven temperature ramp      | Initial temperature: 35 °C<br>Initial time: 0.5 min<br>Ramp rate: 5 C·min <sup>-1</sup><br>Final temperature: 230 °C<br>Hold time: 5 min |

|                                                   |                                                                                                                                                                                                 |
|---------------------------------------------------|-------------------------------------------------------------------------------------------------------------------------------------------------------------------------------------------------|
| Secondary oven temperature offset                 | +5 °C (relative to primary oven)                                                                                                                                                                |
| Modulator temperature offset                      | +15 °C (relative to secondary oven)                                                                                                                                                             |
| Modulation timing                                 | Modulation period: 2.00 s<br>Hot pulse time: 0.50 s<br>Cold pulse time: 0.50 s                                                                                                                  |
| Transfer line temperature                         | 250 °C                                                                                                                                                                                          |
| <b>Mass Spectrometry Method</b>                   |                                                                                                                                                                                                 |
| Instrument description                            | LECO® Pegasus® 4D                                                                                                                                                                               |
| Use GC method total time for MS method total time | Yes                                                                                                                                                                                             |
| Acquisition delay                                 | 180 s                                                                                                                                                                                           |
| Filament active time                              | 180 s to end of run                                                                                                                                                                             |
| Start mass/End mass                               | 35/400                                                                                                                                                                                          |
| Acquisition rate                                  | 100 spectra·s <sup>-1</sup>                                                                                                                                                                     |
| Optimized voltage offset                          | +50 V                                                                                                                                                                                           |
| Electron energy                                   | -70 eV                                                                                                                                                                                          |
| Ion source temperature                            | 250 °C                                                                                                                                                                                          |
| Acquisition masses                                | TIC                                                                                                                                                                                             |
| <b>Data Processing Method</b>                     |                                                                                                                                                                                                 |
| Software description                              | LECO® ChromaTOF® and Statistical Compare (version 4.71.0.0)                                                                                                                                     |
| Baseline tracking/Offset                          | Entire run/0.5 (through middle of noise)                                                                                                                                                        |
| Data points averaged for smoothing                | Auto                                                                                                                                                                                            |
| First dimension peak width                        | 12 slices                                                                                                                                                                                       |
| Mass spectral match required to combine peaks     | 600                                                                                                                                                                                             |
| Second dimension peak width                       | 0.15                                                                                                                                                                                            |
| Min. subpeak signal-to-noise (S/N) for retention  | 6                                                                                                                                                                                               |
| Integration approach                              | Traditional                                                                                                                                                                                     |
| Peak finding                                      | S/N: 50<br>Min. number of apexing masses: 2                                                                                                                                                     |
| Mass to use for area/height calculation           | Unique mass                                                                                                                                                                                     |
| Alignment analyte match criteria                  | Spectral match mass threshold: 10<br>Minimum spectral similarity match: 600<br>Max. number of modulation periods apart: 3<br>Max. retention time difference: 0.2<br>S/N for second peak find: 5 |
| Criteria for inclusion of analytes                | Min. number of samples that contain analyte: 1                                                                                                                                                  |
